# Supplementary material for: Collective cell migration of smooth muscle and endothelial cells: impact of injury versus non-injury stimuli
Source: PubMed Central journal article supplement (PMC4606904; doi:10.1186/s13036-015-0015-y), 2015-10-15

**A**

### SMC Cell Density Comparison In-Growth Assay - Polystyrene

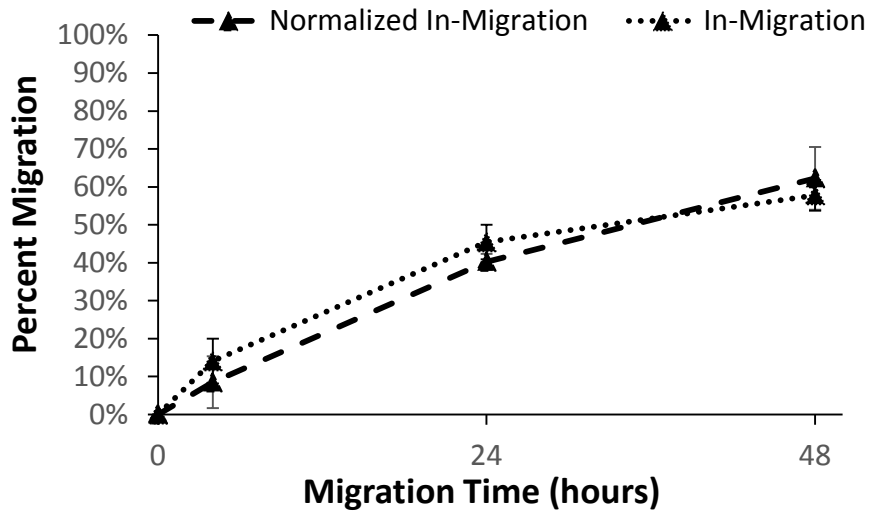**B**

### SMC Cell Density Comparison Scrape Wound Assay - Polystyrene

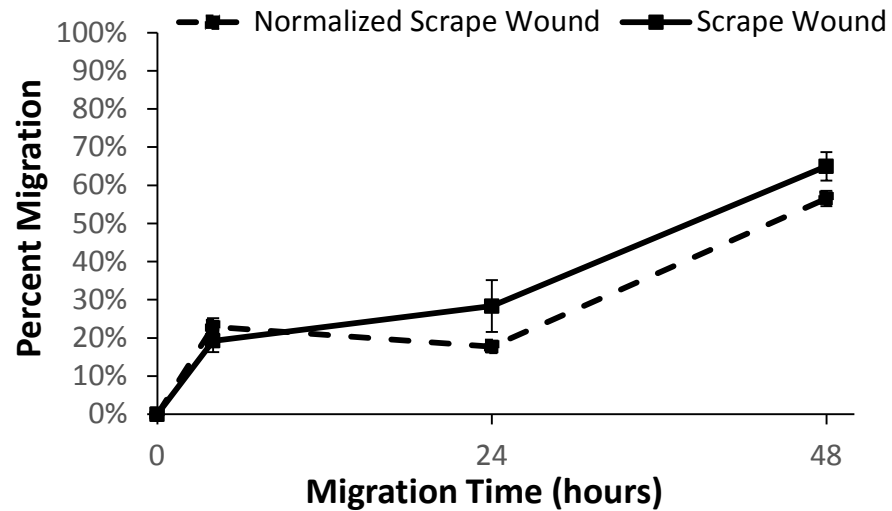

Supplement: 13036_2015_15_MOESM1_ESM.pdf [file 13036_2015_15_MOESM1_ESM.pdf]
